# Supplementary material
Source: publisher site journal article supplement (https://www.spandidos-publications.com/505/downloadSupplementary)

Figure S1. Kaplan-Meier survival analysis based on PD-L1 expression. PD-L1, programmed death-1 ligand 1.

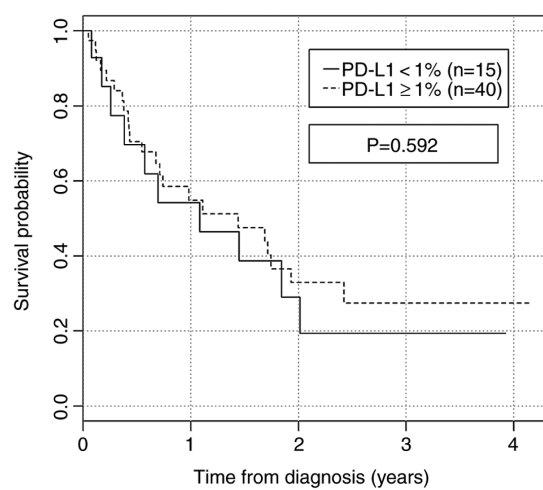

Supplement: Supplementary file 1 [file downloadSupplementary]
